# Supplementary material for: A deep learning approach to pattern recognition for short DNA sequences
Source: bioRxiv or medRxiv preprint supplement (doi:10.1101/353474), 2019-08-09
Supplement: Supplementary file [file 353474-1.pdf]

# Supplementary materials for “A deep learning approach to pattern recognition for short DNA sequences”

---

## Extended Data

|   |      |      |      |      |
|---|------|------|------|------|
| A | 1    | 0    | 0    | 0    |
| T | 0    | 0    | 0    | 1    |
| G | 0    | 0    | 1    | 0    |
| C | 0    | 1    | 0    | 0    |
| N | 0.25 | 0.25 | 0.25 | 0.25 |
| G | 0    | 0    | 1    | 0    |
| C | 0    | 1    | 0    | 0    |
| K | 0    | 0    | 0.5  | 0.5  |
| T | 0    | 0    | 0    | 1    |
| G | 0    | 0    | 1    | 0    |
|   | A    | C    | G    | T    |

Extended Data Figure 1: Example input encoding. Input encoding for a sample 10 base pair sequence.

**a**

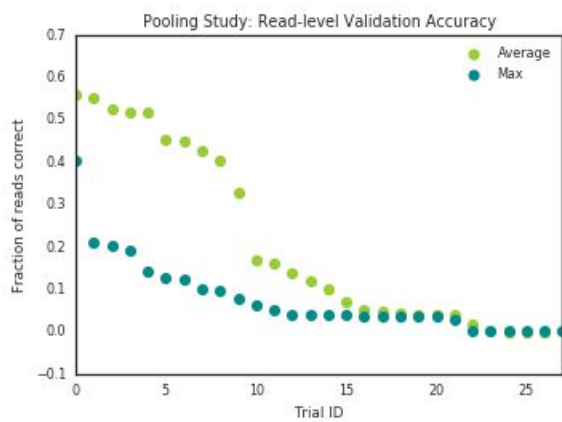

**b**

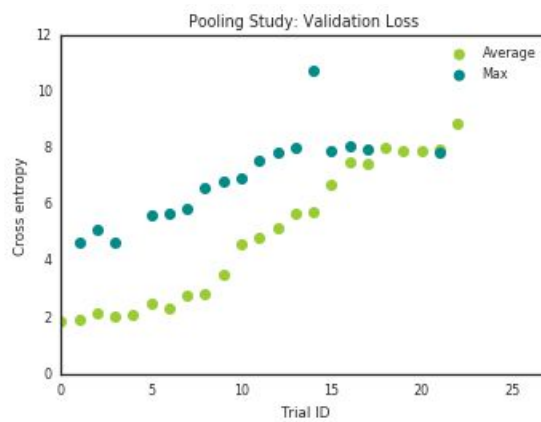

**Extended Data Figure 2: Differences in accuracy and cross entropy loss for average and max pooling.** Performance comparison for average and max pooling trials for both **(a)** read-level accuracy and **(b)** cross entropy loss on validation data, where trial IDs (x-axis) are assigned according to descending validation accuracy.

| Name               | Training Read Length | Spatial Conv Widths | Pointwise Conv Depths | Number FC Layers | Number FC Units | lReLU Slope           | Learning Rate         | Decay Rate            | Keep Prob | Weight Init Scale |
|--------------------|----------------------|---------------------|-----------------------|------------------|-----------------|-----------------------|-----------------------|-----------------------|-----------|-------------------|
| DNN <sub>25</sub>  | 25                   | 13, 9, 9            | 34, 48, 37            | 3                | 2,969           | 1.1619e <sup>-2</sup> | 5.2225e <sup>-4</sup> | 5.0277e <sup>-2</sup> | 87.107%   | 1.6181            |
| DNN <sub>50</sub>  | 50                   | 13, 35, 13          | 51, 151, 114          | 2                | 2,919           | 1.1699e <sup>-2</sup> | 7.4034e <sup>-4</sup> | 7.8038e <sup>-2</sup> | 89.161%   | 2.2217            |
| DNN <sub>100</sub> | 100                  | 5, 9, 13            | 84, 58, 180           | 2                | 2,828           | 1.2538e <sup>-2</sup> | 4.6969e <sup>-4</sup> | 6.5505e <sup>-2</sup> | 94.018%   | 1.1841            |
| DNN <sub>150</sub> | 150                  | 5, 9, 21            | 59, 221, 119          | 3                | 2,908           | 5.7478e <sup>-3</sup> | 7.5135e <sup>-5</sup> | 9.1889e <sup>-2</sup> | 88.834%   | 2.4636            |
| DNN <sub>200</sub> | 200                  | 9, 5, 21            | 197, 116, 119         | 2                | 2,733           | 1.1491e <sup>-2</sup> | 6.7080e <sup>-4</sup> | 6.4534e <sup>-2</sup> | 91.967%   | 0.5878            |

**Extended Data Table 1: Selected neural network hyperparameters.** The best deep neural network (DNN) model hyperparameters identified for each read length  $L=\{25, 50, 100, 150, 200\}$ .

| Phylum                | References | Species | Genera | Families | Orders | Classes |
|-----------------------|------------|---------|--------|----------|--------|---------|
| Proteobacteria        | 7,053      | 5,061   | 1,106  | 158      | 55     | 9       |
| Actinobacteria        | 4,768      | 3,313   | 383    | 68       | 29     | 6       |
| Firmicutes            | 3,814      | 2,531   | 499    | 56       | 13     | 7       |
| Bacteroidetes         | 1,934      | 1,525   | 360    | 39       | 8      | 7       |
| Euryarchaeota         | 834        | 450     | 100    | 28       | 13     | 8       |
| Tenericutes           | 266        | 195     | 8      | 5        | 4      | 1       |
| Spirochaetes          | 146        | 100     | 16     | 6        | 4      | 1       |
| Deinococcus-Thermus   | 118        | 99      | 9      | 3        | 2      | 1       |
| Crenarchaeota         | 113        | 61      | 27     | 8        | 5      | 1       |
| Cyanobacteria         | 113        | 88      | 59     | 30       | 8      | 2       |
| Fusobacteria          | 75         | 37      | 10     | 2        | 1      | 1       |
| Thermotogae           | 70         | 48      | 13     | 5        | 4      | 1       |
| Verrucomicrobia       | 57         | 53      | 22     | 7        | 4      | 3       |
| Acidobacteria         | 45         | 41      | 19     | 5        | 5      | 4       |
| Planctomycetes        | 44         | 31      | 23     | 5        | 3      | 2       |
| Chloroflexi           | 44         | 35      | 26     | 15       | 12     | 8       |
| Aquificae             | 43         | 32      | 14     | 4        | 2      | 1       |
| Synergistetes         | 31         | 25      | 15     | 1        | 1      | 1       |
| Chlamydiae            | 28         | 18      | 7      | 5        | 2      | 1       |
| Chlorobi              | 21         | 16      | 5      | 1        | 1      | 1       |
| Deferribacteres       | 15         | 11      | 7      | 1        | 1      | 1       |
| Thermodesulfobacteria | 14         | 12      | 5      | 1        | 1      | 1       |
| Nitrospirae           | 11         | 10      | 3      | 1        | 1      | 1       |
| Fibrobacteres         | 10         | 4       | 3      | 3        | 3      | 3       |
| Balneolaeota          | 9          | 9       | 4      | 1        | 1      | 1       |
| Chrysiogenetes        | 6          | 4       | 3      | 1        | 1      | 1       |
| Lentisphaerae         | 6          | 5       | 3      | 3        | 3      | 2       |
| Dictyoglomi           | 5          | 2       | 1      | 1        | 1      | 1       |
| Rhodothermaeota       | 5          | 5       | 3      | 2        | 1      | 1       |
| Gemmatimonadetes      | 5          | 4       | 3      | 2        | 2      | 2       |
| Ignavibacteriae       | 4          | 2       | 2      | 2        | 1      | 1       |
| Armatimonadetes       | 4          | 3       | 3      | 3        | 3      | 3       |
| Caldiserica           | 3          | 1       | 1      | 1        | 1      | 1       |
| Calditrichaeota       | 2          | 2       | 1      | 1        | 1      | 1       |
| Thaumarchaeota        | 2          | 2       | 2      | 2        | 2      | 2       |
| Elusimicrobia         | 2          | 1       | 1      | 1        | 1      | 1       |
| Kiritimatiellaeota    | 1          | 1       | 1      | 1        | 1      | 1       |
| Nitrospinae           | 1          | 1       | 1      | 1        | 1      | 1       |

**Extended Data Table 2: NCBI dataset breakdown by phylum.** The distribution of reference sequences and species, genus, family, order, and class

labels across the 38 different phyla represented in our NCBI dataset.

| NCBI-0 <sub>100</sub>                         |            | NCBI-1 <sub>100</sub>                           |           | NCBI-2 <sub>100</sub>                                    |           |
|-----------------------------------------------|------------|-------------------------------------------------|-----------|----------------------------------------------------------|-----------|
| 90% of reads from<br>90% of species per genus |            | Remaining 10% of reads<br>from species in NCBI0 |           | 100% of reads from remaining 10% of species<br>per genus |           |
| Reads                                         | 21,899,715 | Reads                                           | 2,431,551 | Reads                                                    | 2,409,368 |
| Superkingdoms                                 | 2          | Superkingdoms                                   | 2         | Superkingdoms                                            | 2         |
| Phyla                                         | 38         | Phyla                                           | 38        | Phyla                                                    | 23        |
| Classes                                       | 91         | Classes                                         | 91        | Classes                                                  | 48        |
| Orders                                        | 202        | Orders                                          | 202       | Orders                                                   | 110       |
| Families                                      | 479        | Families                                        | 479       | Families                                                 | 227       |
| Genera                                        | 2,768      | Genera                                          | 2,768     | Genera                                                   | 577       |
| Species                                       | 12,609     | Species                                         | 12,609    | Species                                                  | 1,229     |

**Extended Data Table 3: NCBI subset contents for 100 base pair data.** The contents of each subset of our NCBI<sub>100</sub> dataset in terms of the total

number of reads and the number of distinct labels at each taxonomic rank.

| ERR348713   |           | ERR348714   |           | ERR348715   |           |
|-------------|-----------|-------------|-----------|-------------|-----------|
| Read Length | Frequency | Read Length | Frequency | Read Length | Frequency |
| 248         | 4         | 225         | 1         | 370         | 689       |
| 249         | 1         | 246         | 1         | 371         | 11,697    |
| 250         | 15        | 248         | 3         | 372         | 277       |
| 251         | 106       | 249         | 1         | 373         | 2,955     |
| 252         | 33,558    | 250         | 16        | 374         | 31,233    |
| 253         | 156,843   | 251         | 100       | 375         | 38,529    |
| 254         | 22,512    | 252         | 36,868    | 376         | 4,711     |
| 255         | 4         | 253         | 177,126   | 377         | 33        |
|             |           | 254         | 26,554    | 384         | 2         |
|             |           | 255         | 11        |             |           |
|             |           | 259         | 1         |             |           |
| all         | 213,043   | all         | 240,682   | all         | 90,126    |

**Extended Data Table 4: Read length distribution for single-ended mock community replicates.** Distribution of read lengths for each single-ended replicate from ENA study PRJEB4688.

| Name                                                 | Domain   | Proportion | Name                                                  | Domain   | Proportion |
|------------------------------------------------------|----------|------------|-------------------------------------------------------|----------|------------|
| <i>Acidobacterium capsulatum</i> ATCC 51196          | Bacteria | 8.1%       | <i>Rhodopirellula baltica</i> SH 1                    | Bacteria | 1.0%       |
| <i>Akkermansia muciniphila</i> ATCC BAA-835          | Bacteria | 0.9%       | <i>Rhodospirillum rubrum</i> ATCC 11170               | Bacteria | 1.2%       |
| <i>Anaerocellum thermophilum</i> Z-1320, DSM 6725    | Bacteria | 1.2%       | <i>Ruegeria pomeroyi</i> DSS-3                        | Bacteria | 0.6%       |
| <i>Bacteroides thetaiotaomicron</i> VPI-5482         | Bacteria | 0.2%       | <i>Salinispora arenicola</i> CNS-205                  | Bacteria | 0.5%       |
| <i>Bacteroides vulgatus</i> ATCC 8482                | Bacteria | 0.9%       | <i>Salinispora tropica</i> CNB-440                    | Bacteria | 1.6%       |
| <i>Bordetella bronchiseptica</i> RB50                | Bacteria | 9.2%       | <i>Shewanella baltica</i> OS185                       | Bacteria | 3.1%       |
| <i>Burkholderia xenovorans</i> LB400                 | Bacteria | 2.6%       | <i>Shewanella baltica</i> OS223                       | Bacteria | 1.4%       |
| <i>Caldicellulosiruptor saccharolyticus</i> DSM 8903 | Bacteria | 2.0%       | <i>Sulfitobacter</i> sp. EE-36                        | Bacteria | 2.0%       |
| <i>Chlorobaculum tepidum</i> TLS                     | Bacteria | 0.5%       | <i>Sulfitobacter</i> sp. NAS-14.1                     | Bacteria | 4.3%       |
| <i>Chlorobium limicola</i> DSM 245                   | Bacteria | 0.4%       | <i>Sulfurihydrogenibium</i> sp. YO3AOP1               | Bacteria | 1.6%       |
| <i>Chlorobium phaeobacteroides</i> DSM 266           | Bacteria | 1.9%       | <i>Sulfurihydrogenibium yellowstonense</i> SS-5       | Bacteria | 2.6%       |
| <i>Chlorobium phaeovibrioides</i> DSM 265            | Bacteria | 0.3%       | <i>Thermoanaerobacter pseudethanolicus</i> ATCC 33223 | Bacteria | 0.8%       |
| <i>Chloroflexus aurantiacus</i> J-10-fl              | Bacteria | 0.9%       | <i>Thermotoga neapolitana</i> DSM 4359                | Bacteria | 0.7%       |
| <i>Clostridium thermocellum</i> ATCC 27405           | Bacteria | 0.6%       | <i>Thermotoga petrophila</i> RKU-1                    | Bacteria | 1.0%       |
| <i>Deinococcus radiodurans</i> R1                    | Bacteria | 1.7%       | <i>Thermotoga</i> sp. RQ2                             | Bacteria | 3.4%       |
| <i>Desulfovibrio desulfuricans</i> ATCC 27774        | Bacteria | 1.4%       | <i>Thermus thermophilus</i> HB8                       | Bacteria | 0.5%       |
| <i>Desulfovibrio piger</i> ATCC 29098                | Bacteria | 3.1%       | <i>Treponema denticola</i> ATCC 35405                 | Bacteria | 0.2%       |
| <i>Dictyoglomus turgidum</i> DSM 6724                | Bacteria | 3.5%       | <i>Treponema vincentii</i> I                          | Bacteria | 0.2%       |
| <i>Erwinia chrysanthemi</i>                          | Bacteria | 0.3%       | <i>Zymomonas mobilis mobilis</i> ZM4                  | Bacteria | 0.8%       |
| <i>Enterococcus faecalis</i> V583                    | Bacteria | 4.3%       | <i>Archaeoglobus fulgidus</i> DSM 4304                | Archaea  | 0.3%       |
| <i>Fusobacterium nucleatum</i> ATCC 25586            | Bacteria | 0.3%       | <i>Ignicoccus hospitalis</i> KIN4/I                   | Archaea  | 1.2%       |
| <i>Gemmatimonas aurantiaca</i> T-27T                 | Bacteria | 0.7%       | <i>Methanocaldococcus jannaschii</i> DSM 2661         | Archaea  | 0.9%       |
| <i>Herpetosiphon aurantiacus</i> ATCC 23779          | Bacteria | 1.8%       | <i>Methanococcus maripaludis</i> C5                   | Archaea  | 0.4%       |
| <i>Hydrogenobaculum</i> sp. Y04AAS1                  | Bacteria | 1.1%       | <i>Methanococcus maripaludis</i> S2                   | Archaea  | 0.5%       |
| <i>Leptothrix cholodnii</i> SP-6                     | Bacteria | 1.8%       | <i>Nanoarchaeum equitans</i> Kin4-M                   | Archaea  | 1.0%       |
| <i>Nitrosomonas europaea</i> ATCC 19718              | Bacteria | 4.3%       | <i>Pyrobaculum aerophilum</i> IM2                     | Archaea  | 0.5%       |
| <i>Nostoc</i> sp. PCC 7120                           | Bacteria | 2.7%       | <i>Pyrobaculum caldifontis</i> JCM 11548              | Archaea  | 2.6%       |
| <i>Pelodictyon phaeoclathratiforme</i> BU-1          | Bacteria | 0.1%       | <i>Pyrococcus horikoshii</i> OT3                      | Archaea  | 1.9%       |
| <i>Persephonella marina</i> EX-H1                    | Bacteria | 5.5%       | <i>Sulfolobus tokodaii</i> 7(S311)                    | Archaea  | 0.7%       |
| <i>Porphyromonas gingivalis</i> ATCC 33277           | Bacteria | 0.2%       |                                                       |          |            |

**Extended Data Table 5: True contents of 59-organism mock community.** List of 10 Archaea and 59 bacterial strains present in the mock community from ENA study PRJEB6244.

| Run Accession | Number of Reads (unpaired) | Community Type | Run Accession | Number of Reads (unpaired) | Community Type |
|---------------|----------------------------|----------------|---------------|----------------------------|----------------|
| ERR777676     | 413,164                    | Even           | ERR777718     | 28,704                     | Uneven         |
| ERR777677     | 77,748                     | Even           | ERR777719     | 23,526                     | Uneven         |
| ERR777678     | 331,464                    | Even           | ERR777720     | 49,458                     | Uneven         |
| ERR777695     | 1,187,736                  | Even           | ERR777721     | 62,430                     | Uneven         |
| ERR777696     | 3,506,882                  | Even           | ERR777722     | 44,192                     | Uneven         |
| ERR777697     | 3,268,324                  | Even           | ERR777726     | 711,606                    | Even           |
| ERR777698     | 2,185,152                  | Even           | ERR777727     | 667,110                    | Even           |
| ERR777699     | 26,282                     | Even           | ERR777728     | 612,894                    | Even           |
| ERR777700     | 5,730                      | Even           | ERR777729     | 1,316,194                  | Uneven         |
| ERR777701     | 4,052                      | Even           | ERR777730     | 43,378                     | Even           |
| ERR777702     | 736,790                    | Even           | ERR777731     | 48,706                     | Even           |
| ERR777703     | 184,040                    | Even           | ERR777732     | 3,299,128                  | Even           |
| ERR777704     | 584,670                    | Even           | ERR777733     | 1,910,258                  | Even           |
| ERR777705     | 2,810,390                  | Even           | ERR777734     | 13,224                     | Even           |
| ERR777706     | 2,263,688                  | Even           | ERR777735     | 5,272                      | Even           |
| ERR777707     | 553,630                    | Uneven         | ERR777736     | 815,732                    | Even           |
| ERR777708     | 2,280,446                  | Uneven         | ERR777737     | 488,286                    | Even           |
| ERR777709     | 2,017,580                  | Uneven         | ERR777738     | 403,586                    | Even           |
| ERR777710     | 2,162,570                  | Even           | ERR777739     | 969,458                    | Even           |
| ERR777711     | 3,120,284                  | Uneven         | ERR777740     | 62,898                     | Uneven         |
| ERR777712     | 3,510                      | Even           | ERR777741     | 524,110                    | Uneven         |
| ERR777713     | 15,158                     | Even           | ERR777742     | 464,972                    | Uneven         |
| ERR777714     | 3,290                      | Even           | ERR777746     | 24,690                     | Even           |
| ERR777715     | 70,706                     | Even           | ERR777747     | 62,594                     | Even           |
| ERR777716     | 91,702                     | Even           | ERR777748     | 91,438                     | Even           |
| ERR777717     | 100,696                    | Even           |               |                            |                |

**Extended Data Table 6: Community type by run accession.** List of ENA accessions for mock community sequencing runs from study PRJEB6244 along with their corresponding community type (even or uneven) and read count.



## Appendix 1: NCBI Data

Our NCBI dataset includes 13,838 distinct species which are distributed across 38 phyla according to Extended Data Table 2.

Subsequences from these references comprise our synthetic  $\text{NCBI}_L$  read sets. The total number of reads is thus determined by the length  $L$  used to generate short reads. The total number of synthetic reads contained in each of our  $\text{NCBI}_L$  dataset for read lengths 25, 50, 100, 150, and 200 are 28,219,784, 27,726,734, 26,740,634, 25,754,534, and 24,768,434, respectively.

## Appendix 2: NCBI Data Splits and Model Selection

For model selection, we split our  $\text{NCBI}_L$  datasets into subsets for training and validation. As an example, Extended Data Table 3 enumerates the contents of our  $\text{NCBI-0}_{100}$ ,  $\text{NCBI-1}_{100}$ , and  $\text{NCBI-2}_{100}$  subsets. For  $L = \{25, 50, 100, 150, 200\}$  we selected a model  $\mathcal{L}$  by training on noiseless reads from  $\text{NCBI-0}_L$  and performing a hyperparameter search to maximize read-level accuracy on a validation set comprised of the reads in  $\text{NCBI-1}_L$  and  $\text{NCBI-2}_L$  with base-flipping noise injected at a rate of 1%. Because reads in  $\text{NCBI-2}_L$  are from species held out during training, we measured read-level accuracy on this validation set as follows:

1. If the current example arose from the reference sequence of a species represented in  $\text{NCBI-0}_L$ , the prediction by  $\text{DNN}_L$  is correct if the model assigns the most probability mass to the true species label.

2. Otherwise, if the example arose from the reference sequence of a held-out species, the model's prediction is correct if the true genus label receives the most probability mass when the model's output is marginalized to the genus-level distribution.

We use Google Vizier<sup>34</sup> with the default search algorithm to explore the hyperparameter space and optimize the objective computed in this manner. The hyperparameters in Extended Data Table 1 are the best ones discovered by this search for each read length  $L=\{25, 50, 100, 150, 200\}$ .

### **Appendix 3: Mock Community Data**

The sequencing data from study PRJEB4688 comes from a community containing equal concentrations of the following 20 bacterial species: *Acinetobacter baumannii* str. 5377, *Actinomyces odontolyticus* str. 1A.21, *Bacillus cereus* str. NRS 248, *Bacteroides vulgatus* str. NCTC 11154, *Clostridium beijerinckii* str. NCIMB 8052, *Deinococcus radiodurans* str. R1, (smooth), *Enterococcus faecalis* str. OG1RF, *Escherichia coli* str. K12 substr. MG1655, *Helicobacter pylori* str. 26695, *Lactobacillus gasseri* str. 63 AM, *Listeria monocytogenes* str. EGDe, *Neisseria meningitidis* str. MC58, *Propionibacterium acnes* str. KPA171202, *Pseudomonas aeruginosa* str. PAO1-LAC, *Rhodobacter sphaeroides* str. ATH 2.4.1, *Staphylococcus aureus* TCH1516, *Staphylococcus epidermidis* FDA str. PCI 1200, *Streptococcus agalactiae* str. 2603 V/R, *Streptococcus mutans* str. UA159, and *Streptococcus pneumoniae* str. TIGR4. There are six replicates in total: three single-ended and three paired-end replicates. The paired-end replicates, ERR619081-3, contain 481,364, 426,086, and 180,252 unpaired reads, respectively, all of length 251 base pairs. The single-ended replicates,

ERR348713-5, contain reads of variable lengths ranging from 225 to 384 base pairs distributed according to Extended Data Table 4.

The mock community sequenced in study PRJEB6244, contains 59 distinct organisms. The even version of the community contains an equal number of molecules per strain, but there is also an uneven version for which strain amounts are log-normally distributed within each phylum.

Extended Data Table 5 gives the specific strains and uneven concentrations according to previous publications.<sup>23,31</sup>

Adjusting for updated taxonomic assignments for some organisms, these 59 strains are covered by the following 56 species labels in NCBI: *Acidobacterium capsulatum*, *Akkermansia muciniphila*, *Bacteroides thetaiotamicron*, *Bacteroides vulgatus*, *Bordetella bronchiseptica*, *Caldicellulosiruptor bescii*, *Caldicellulosiruptor saccharolyticus*, *Chlorobaculum tepidum*, *Chlorobium limicola*, *Chlorobium phaeobacteroides*, *Chlorobium phaeovibrioides*, *Chloroflexus aurantiacus*, *Deinococcus radiodurans*, *Desulfovibrio desulfuricans*, *Desulfovibrio piger*, *Dickeya dadantii*, *Dictyoglomus turgidum*, *Enterococcus faecalis*, *Fusobacterium nucleatum*, *Gemmatimonas aurantiaca*, *Herpetosiphon aurantiacus*, *Hydrogenobaculum sp.*, *Leptothrix cholodnii*, *Nitrosomonas europaea*, *Nostoc sp.*, *Paraburkholderia xenovorans*, *Pelodictyon phaeoclathratiforme*, *Persephonella marina*, *Porphyromonas gingivalis*, *Rhodopirellula baltica*, *Rhodospirillum rubrum*, *Ruegeria pomeroyi*, *Ruminiclostridium thermocellum*, *Salinispora arenicola*, *Salinispora tropica*, *Shewanella baltica*, *Sulfitobacter sp.*, *Sulfurihydrogenibium sp.*, *Sulfurihydrogenibium yellowstonense*, *Thermoanaerobacter pseudethanolicus*, *Thermotoga*

*neapolitana*, *Thermotoga petrophila*, *Thermotoga sp.*, *Thermus thermophilus*, *Treponema denticola*, *Treponema vincentii*, *Zymomonas mobilis*, *Archaeoglobus fulgidus*, *Ignicoccus hospitalis*, *Methanocaldococcus jannaschii*, *Methanococcus maripaludis*, *Nanoarchaeum equitans*, *Pyrobaculum aerophilum*, *Pyrobaculum calidifontis*, *Pyrococcus horikoshii*, and *Sulfolobus tokodaii*.

At the genus-level, these organisms are covered by 45 labels: *Acidobacterium*, *Akkermansia*, *Bacteroides*, *Bordetella*, *Caldicellulosiruptor*, *Chlorobaculum*, *Chlorobium*, *Chloroflexus*, *Deinococcus*, *Desulfovibrio*, *Dictyoglomus*, *Dickeya*, *Enterococcus*, *Fusobacterium*, *Gemmatimonas*, *Herpetosiphon*, *Hydrogenobaculum*, *Leptothrix*, *Nitrosomonas*, *Nostoc*, *Paraburkholderia*, *Pelodictyon*, *Persephonella*, *Porphyromonas*, *Rhodopirellula*, *Rhodospirillum*, *Ruegeria*, *Ruminiclostridium*, *Salinispora*, *Shewanella*, *Sulfitobacter*, *Sulfurihydrogenibium*, *Thermoanaerobacter*, *Thermotoga*, *Thermus*, *Treponema*, *Zymomonas*, *Archaeoglobus*, *Ignicoccus*, *Methanocaldococcus*, *Methanococcus*, *Nanoarchaeum*, *Pyrobaculum*, *Pyrococcus*, and *Sulfolobus*.

Some of the labels for this 59-organism mock community are missing from our NCBI dataset, namely the genus label *Nanoarchaeum* and the eight species labels *Hydrogenobaculum sp.*, *Leptothrix cholodnii*, *Nostoc sp.*, *Sulfitobacter sp.*, *Sulfurihydrogenibium sp.*, *Thermotoga sp.*, *Treponema vincentii*, and *Nanoarchaeum equitans*. For our analyses, we used all of the mock community sequencing runs included in study PRJEB6244 which amounts to the 51 runs listed

in Extended Data Table 6. All of the reads contained in the data files for each of these runs are 250 base pairs, but the total number of reads per run varies from 3,290 to 3,506,882.

#### **Appendix 4: Pooling Studies**

In the current work, we explored one straightforward approach for handling the variable read lengths produced by next-generation sequencing technologies: we enabled running a given model on any query at least as long as the fixed input dimension of the fully-connected layers by tiling the fully-connected layers and adding a pooling layer between the last fully-connected layer and the softmax output layer. We determined which type of pooling works best on our species classification problem by training several models on our NCBI-0<sub>100</sub> data with the effective width of the fully-connected layers set to 80 base pairs to trigger modeling tiling and pooling. For both average and max pooling, we fixed the number of depthwise separable convolutional layers to 1 and performed random search over the remaining hyperparameters. We trained each model for 200,000-400,000 training iterations and then evaluated on a validation set as described in Appendix 2.

In total, we trained 40 models with max pooling and 27 with average pooling. Despite the skew in number of attempted trials, we found models with average pooling to perform significantly better than those with max pooling; the models with average pooling attained higher accuracies and lower losses at both train and evaluation time (Extended Data Figure 2). 27 of the models with max pooling layers either failed to converge or never outperformed random guessing, compared to only 9 such models with average pooling. The head-to-head comparison of the highest achieved read-level accuracies on the validation set further reveals the extent of this

performance differential: the best average pooling model outperforms the best max pooling model by more than 34.6%. This pooling exploration established a sound method of constructing relatively flexible models for read-level species classification of 16S sequencing data. Based on these results, all models presented in the current study use average pooling.

## **Appendix 5: precisionFDA**

The model architecture described in the current work was used as the basis of our submission to the recent precisionFDA Pathogen Detection Challenge ([www.precision.fda.gov/challenges/2](http://www.precision.fda.gov/challenges/2)). We independently trained deep neural networks to predict read-level multilocus sequence type (MLST), serotype, and strain labels. Unlike our models for 16S-based species classification, the neural networks we trained for pathogen detection were trained on raw sequencing data from NCBI rather than synthetic read sets. Moreover, the models for this challenge were used to analyze full metagenomic data rather than reads from just the 16S gene.

While exact hyperparameter values varied from model to model, the number of parameters in the neural network for MLST prediction was on the same order of magnitude as for the species classification models described in the current study. The neural networks for strain and serotype prediction used roughly twice as many parameters. Considering that these models learn read-level mappings for whole-genome shotgun data as opposed to reads from a single gene, our proposed neural network architecture scales well.

We reused the iterative analysis approach from our mock community evaluations to produce our final strain and serotype predictions based on the outputs of the neural network models. For the

MLST task, this approach was modified slightly. For each sample, reads were subsetted to those which aligned to MLST genes using BWA. An iterative approach was used on this subset of reads, first to find the most likely allele for each gene, and then to determine the most likely MLST.
